# Supplementary material for: Discovery of novel isoliquiritigenin analogue ISL-17 as a potential anti-gastric cancer agent
Source: PubMed Central journal article supplement (PMC7306486; doi:10.1042/bsr20201199), 2020-06-19
Supplement: BSR-2020-1199_supp.pdf [file BSR-2020-1199_supp.pdf]

## Supplementary Information

# Discovery of novel Isoliquiritigenin analogue ISL-17 as a potential anti-gastric cancer agent

Fengchang Huang<sup>1</sup>, Jin Wang<sup>2</sup>, Yi Xu<sup>3</sup>, Yunfei Zhang<sup>1</sup>, Ning Xu<sup>1</sup>, Liang Yin<sup>1,\*</sup>

<sup>1</sup> Department of Oncology, the First Affiliated Hospital of Kunming Medical University, Kunming 650032, Yunnan Province, China

<sup>2</sup> Department of Vascular surgery, the First Affiliated Hospital of Kunming Medical University, Kunming 650032, Yunnan Province, China

<sup>3</sup> Department of Pharmacy, the First Affiliated Hospital of Wenzhou Medical University, Wenzhou 325000, Zhejiang, China

### \* Correspondence

Liang Yin

Department of Oncology, the First Affiliated Hospital of Kunming Medical University,  
No. 295 Xichang Road, Wuhua District, Kunming 650032, Yunnan Province, China

**E-mail:** kmumdyl@sina.com

**Tel:** +86-0871-65324888; **Fax:** +86-0871-65324888





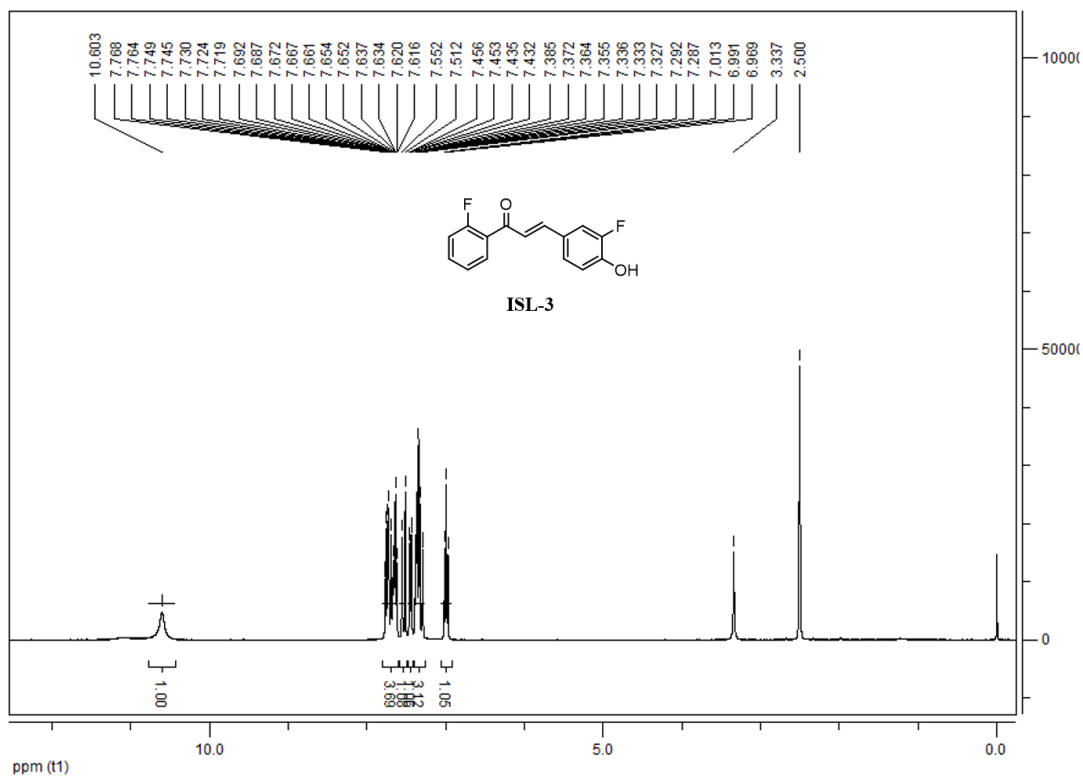

**Figure S5.** The  $^1\text{H}$  NMR spectra of compound **ISL-3** ( $\text{DMSO-}d_6$ , Bruker AVANVEIII 400)

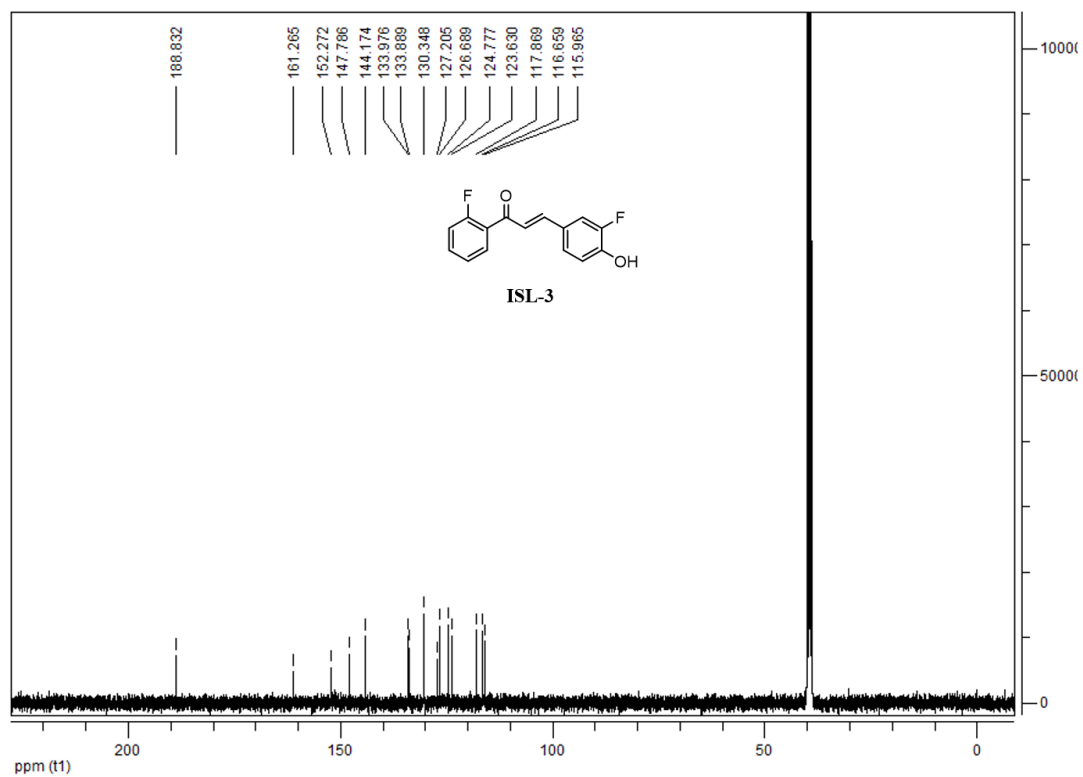

**Figure S6.** The  $^{13}\text{C}$  NMR spectra of compound **ISL-3** ( $\text{DMSO-}d_6$ , Bruker AVANVEIII 400)

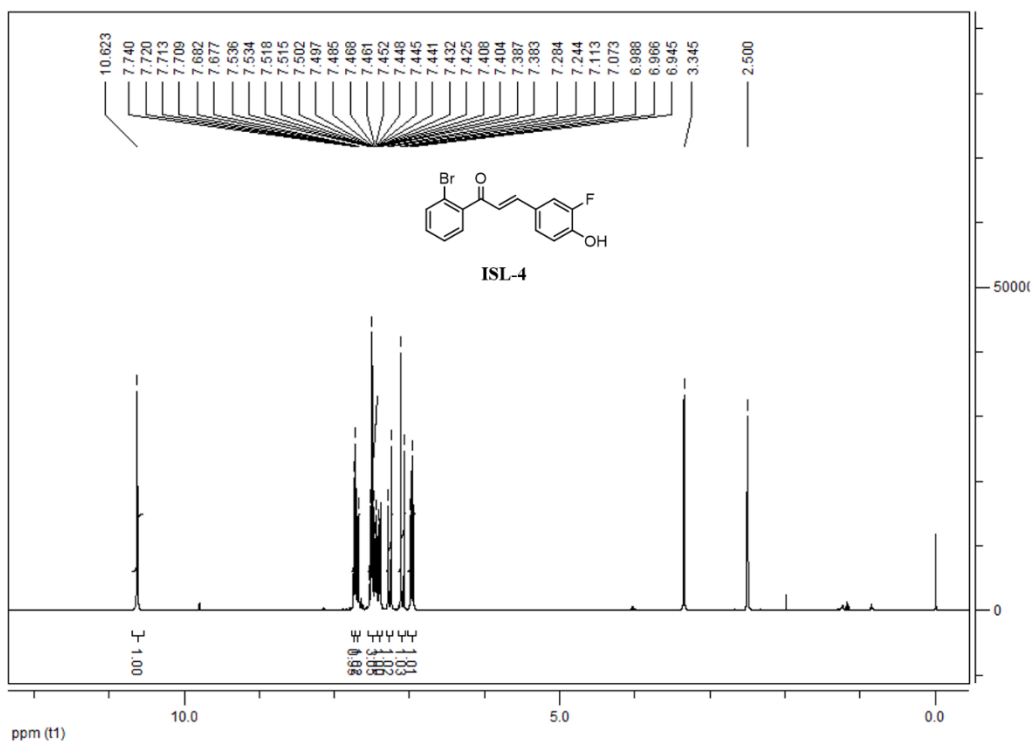

**Figure S7.** The  $^1\text{H}$  NMR spectra of compound **ISL-4** ( $\text{DMSO-}d_6$ , Bruker AVANVEIII 400)

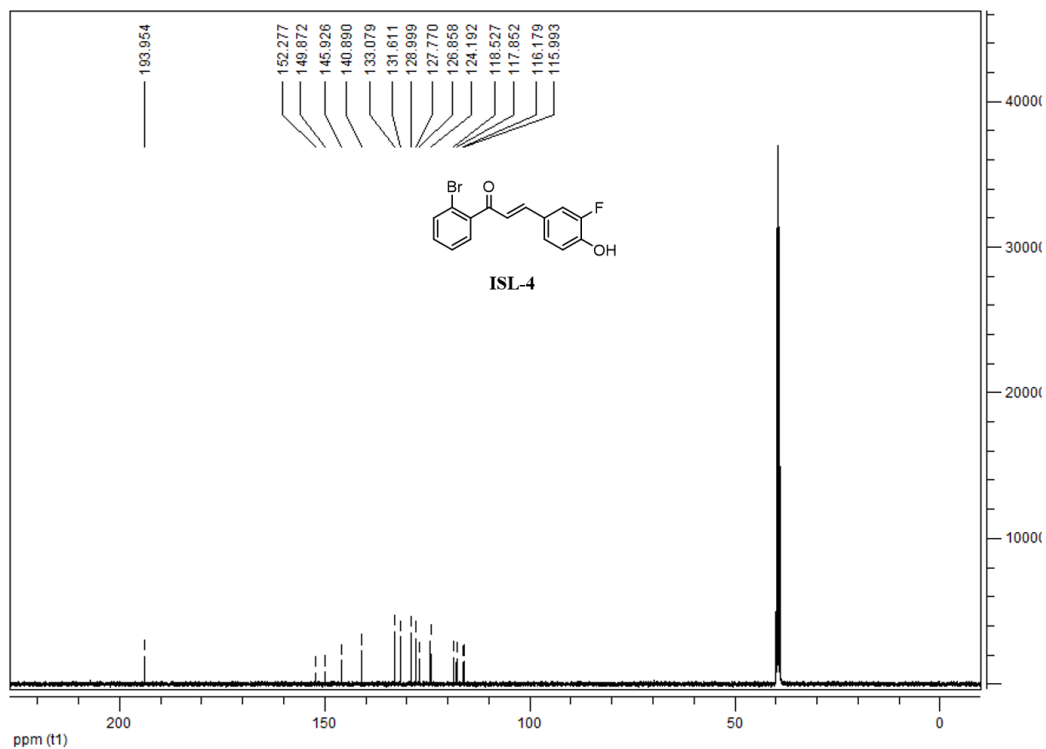

**Figure S8.** The  $^{13}\text{C}$  NMR spectra of compound **ISL-4** ( $\text{DMSO-}d_6$ , Bruker AVANVEIII 400)



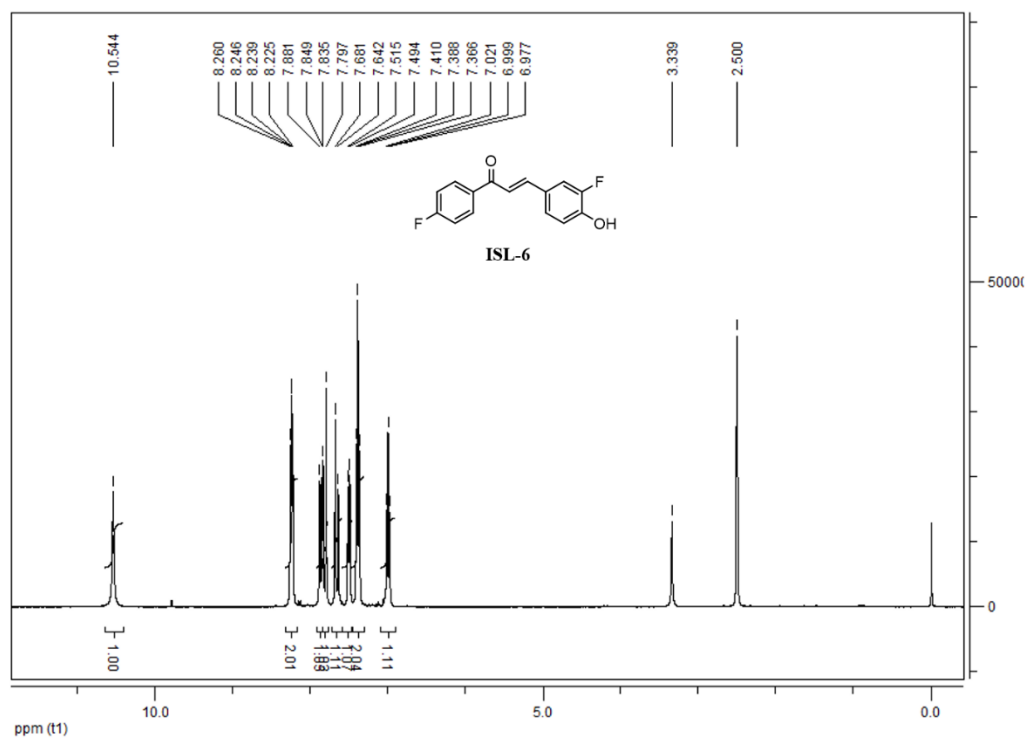

**Figure S11.** The  $^1\text{H}$  NMR spectra of compound **ISL-6** (DMSO- $d_6$ , Bruker AVANVEIII 400)

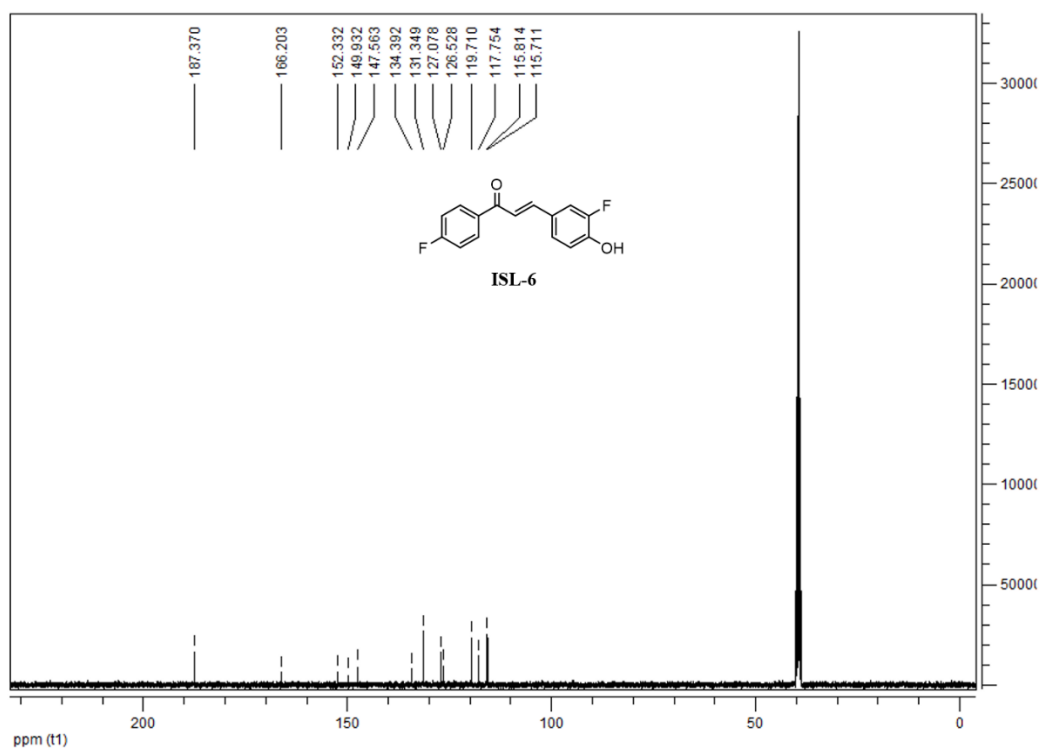

**Figure S12.** The  $^{13}\text{C}$  NMR spectra of compound **ISL-6** (DMSO- $d_6$ , Bruker AVANVEIII 400)

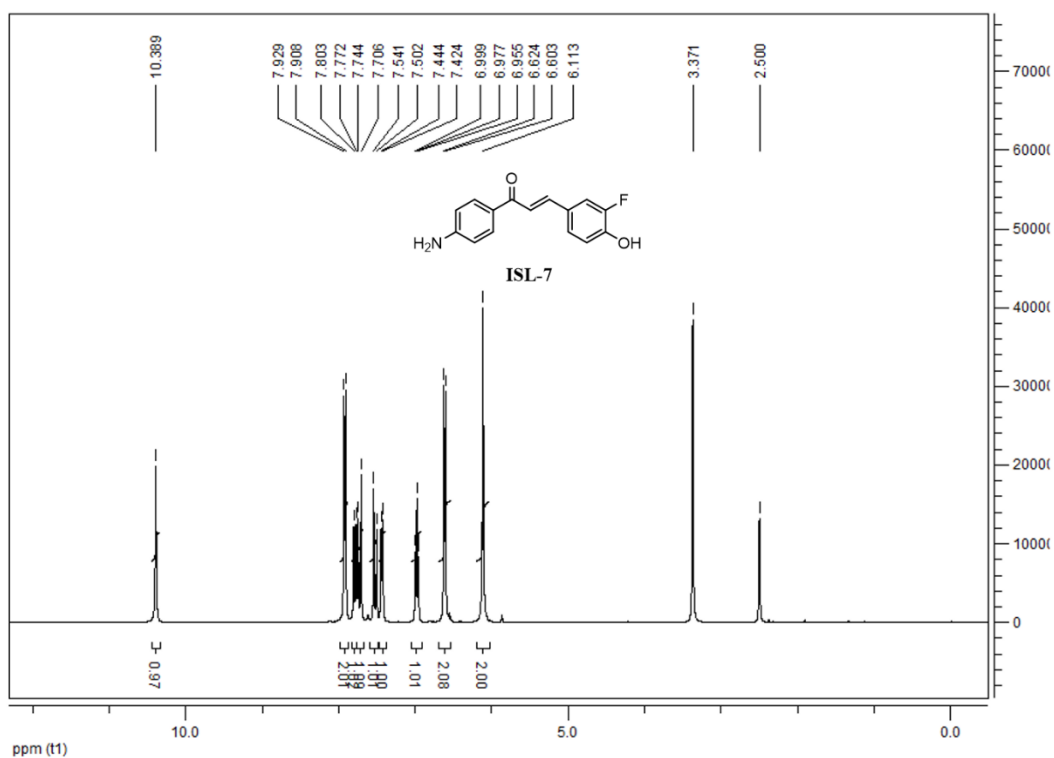

**Figure S13.** The  $^1\text{H}$  NMR spectra of compound **ISL-7** ( $\text{DMSO-}d_6$ , Bruker AVANVEIII 400)

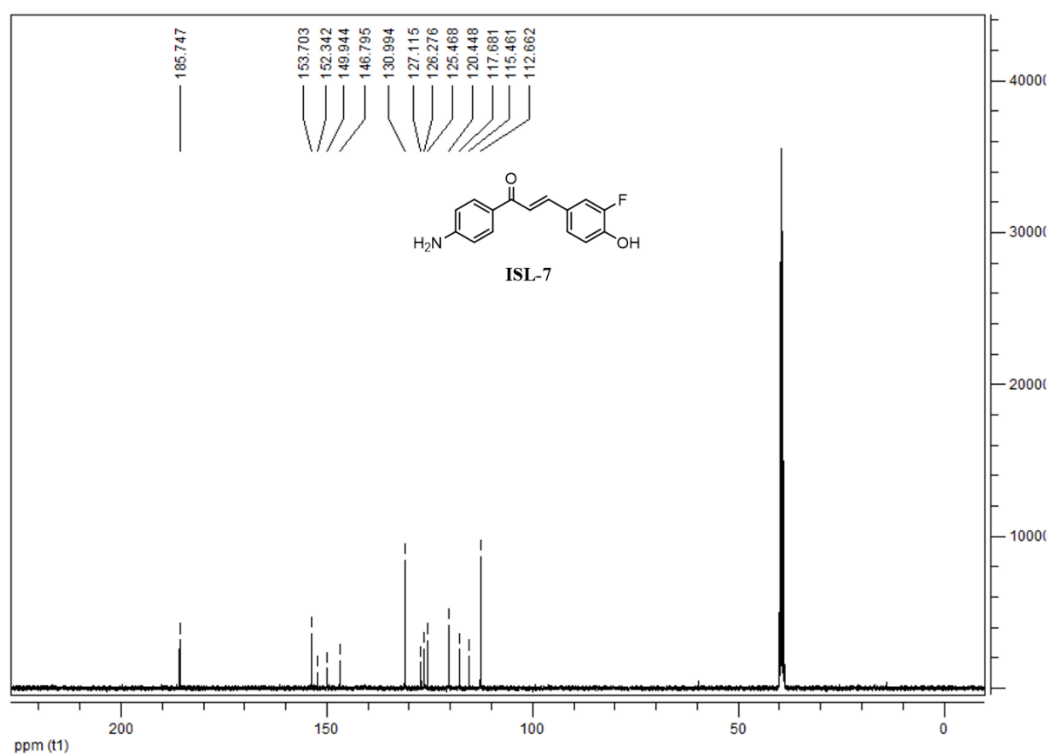

**Figure S14.** The  $^{13}\text{C}$  NMR spectra of compound **ISL-7** ( $\text{DMSO-}d_6$ , Bruker AVANVEIII 400)



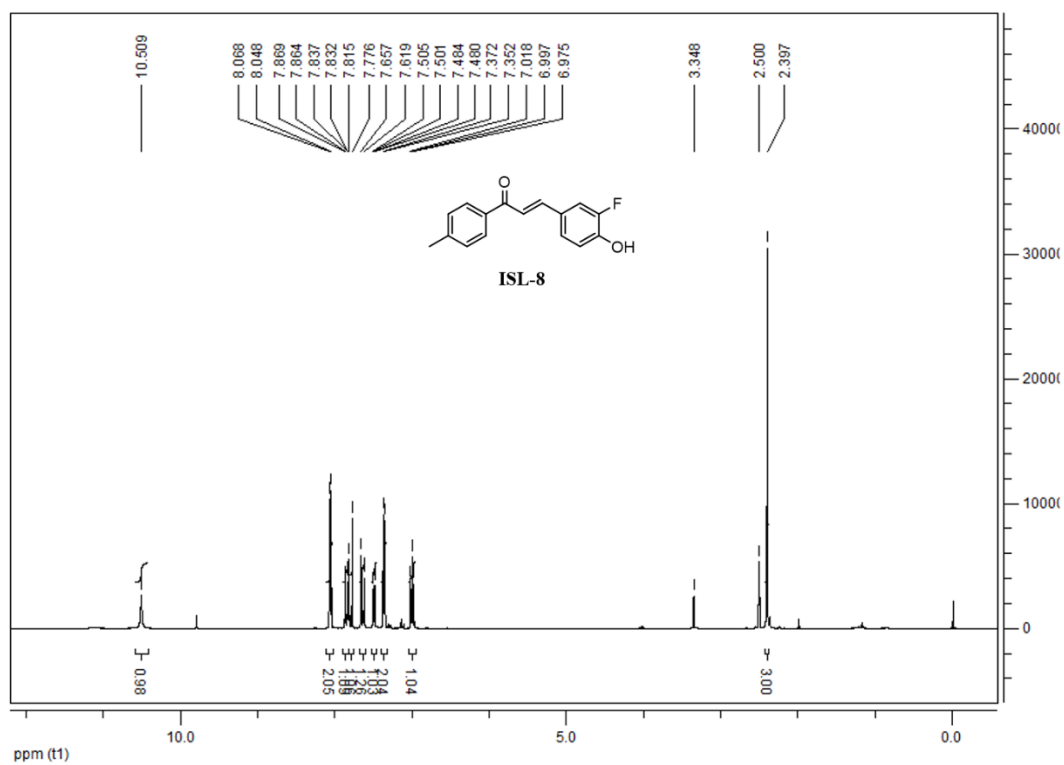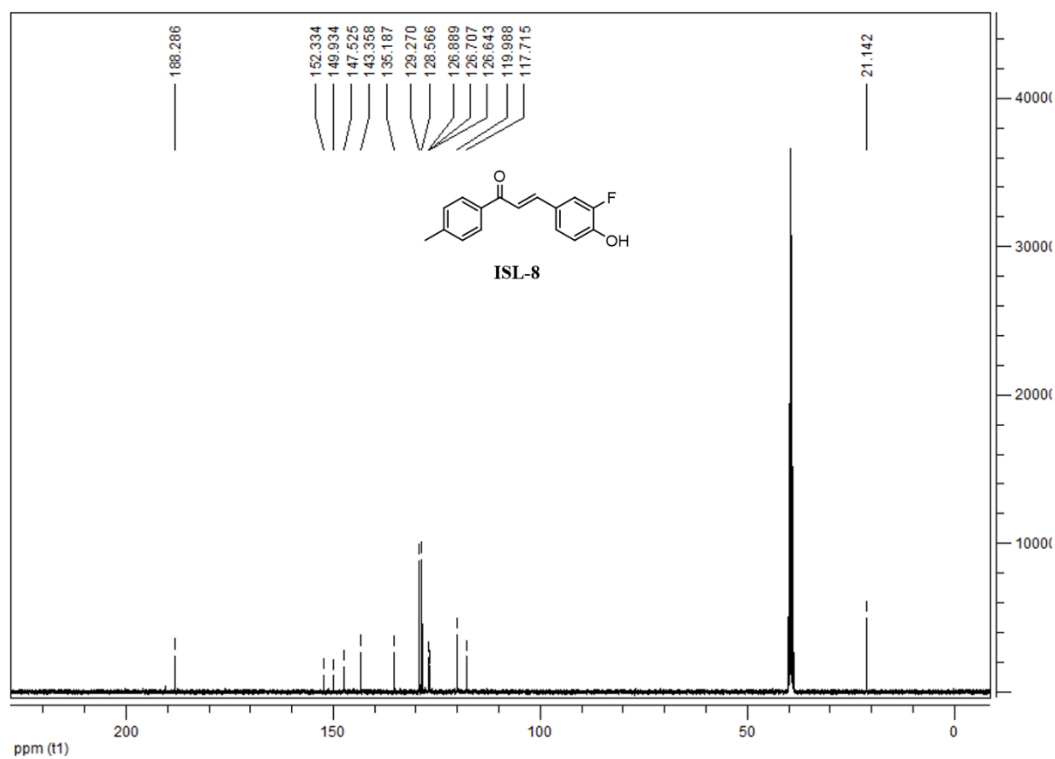



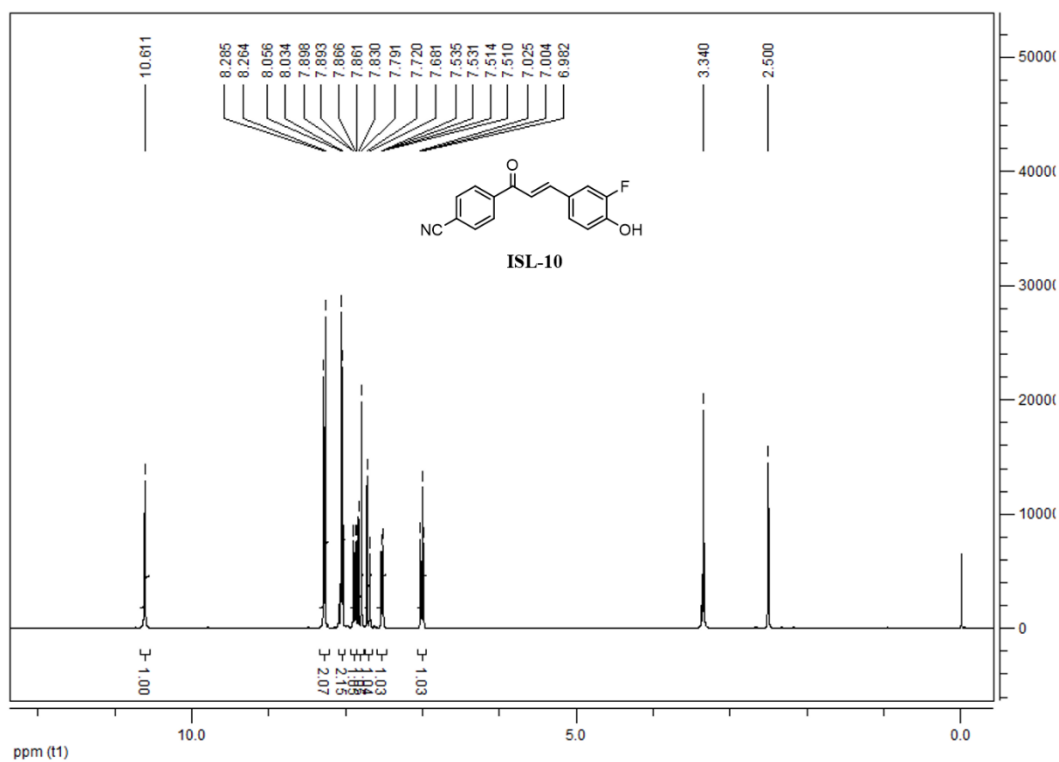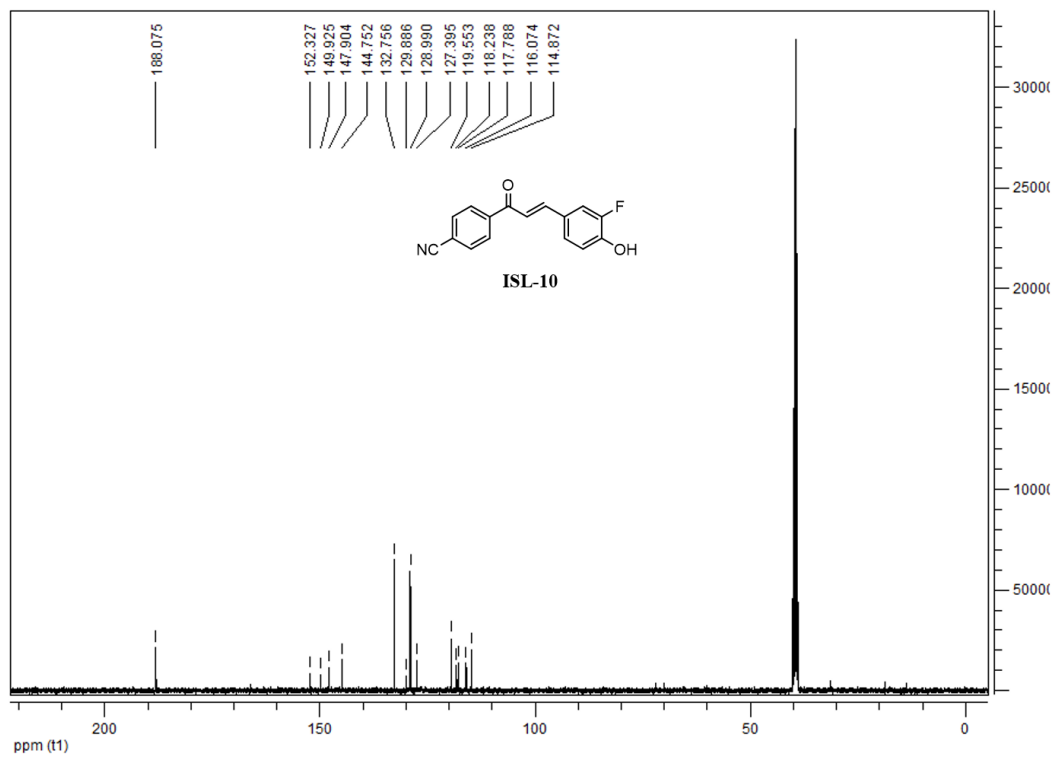



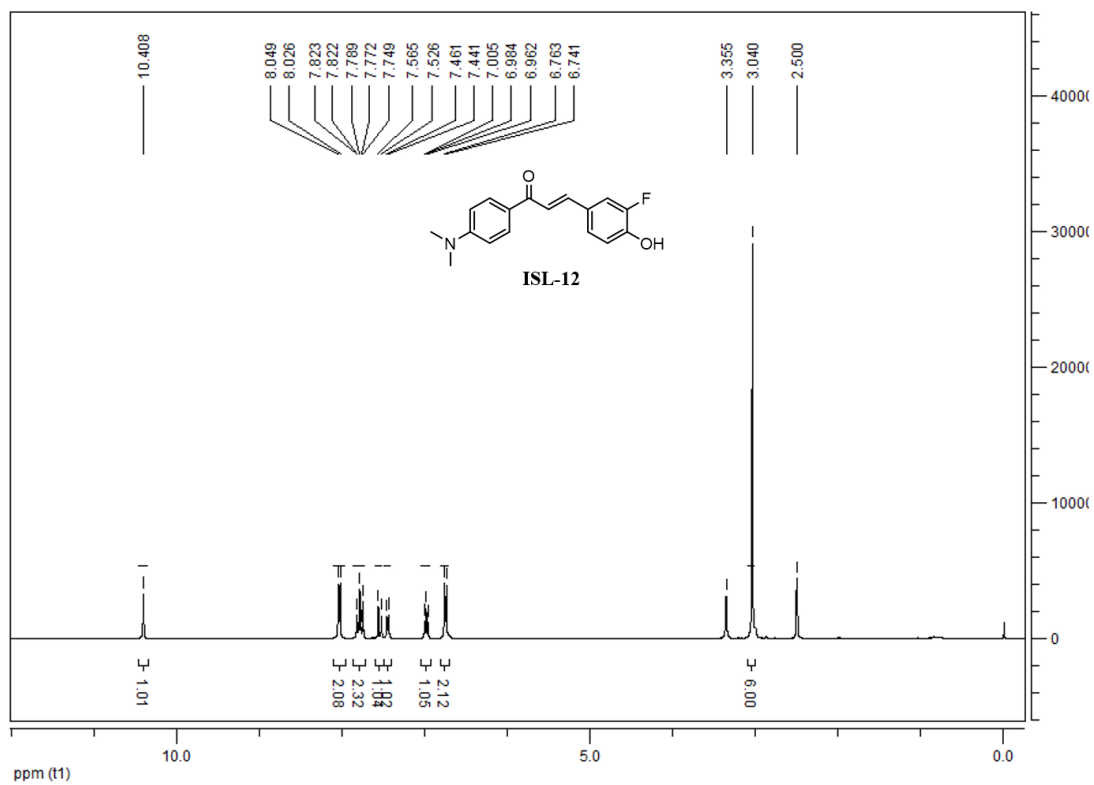

**Figure S23.** The  $^1\text{H}$  NMR spectra of compound ISL-12 (DMSO- $d_6$ , Bruker AVANVEIII 400)

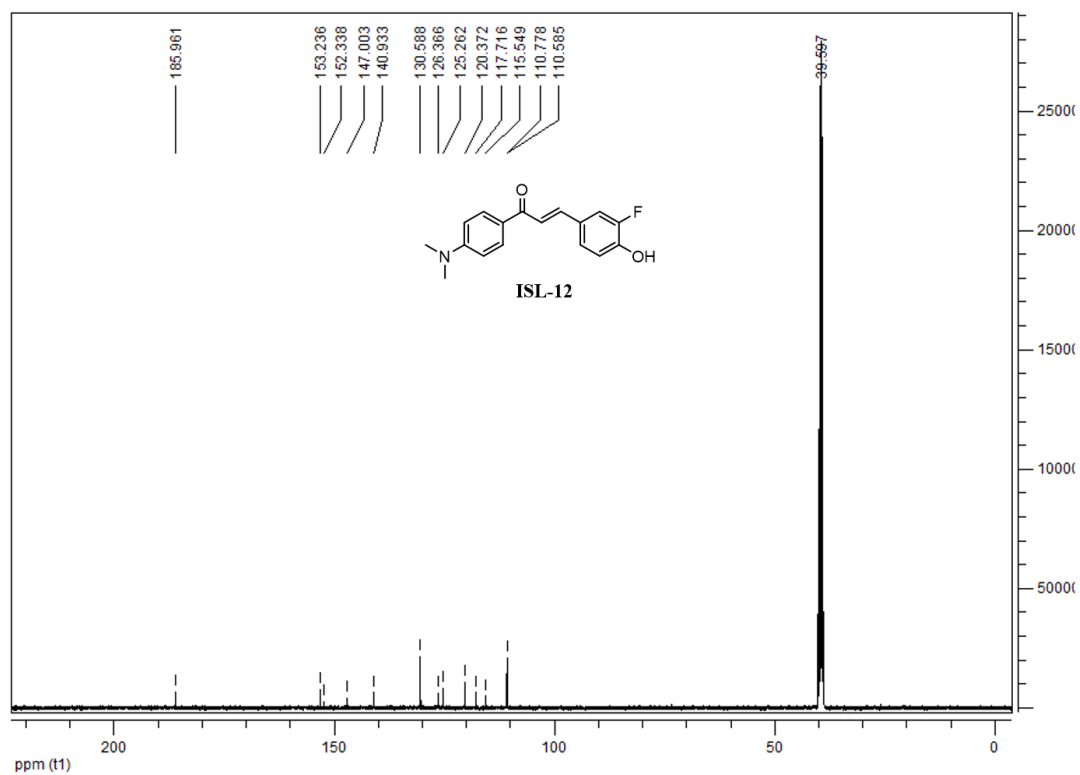

**Figure S24.** The  $^{13}\text{C}$  NMR spectra of compound ISL-12 (DMSO- $d_6$ , Bruker AVANVEIII 400)

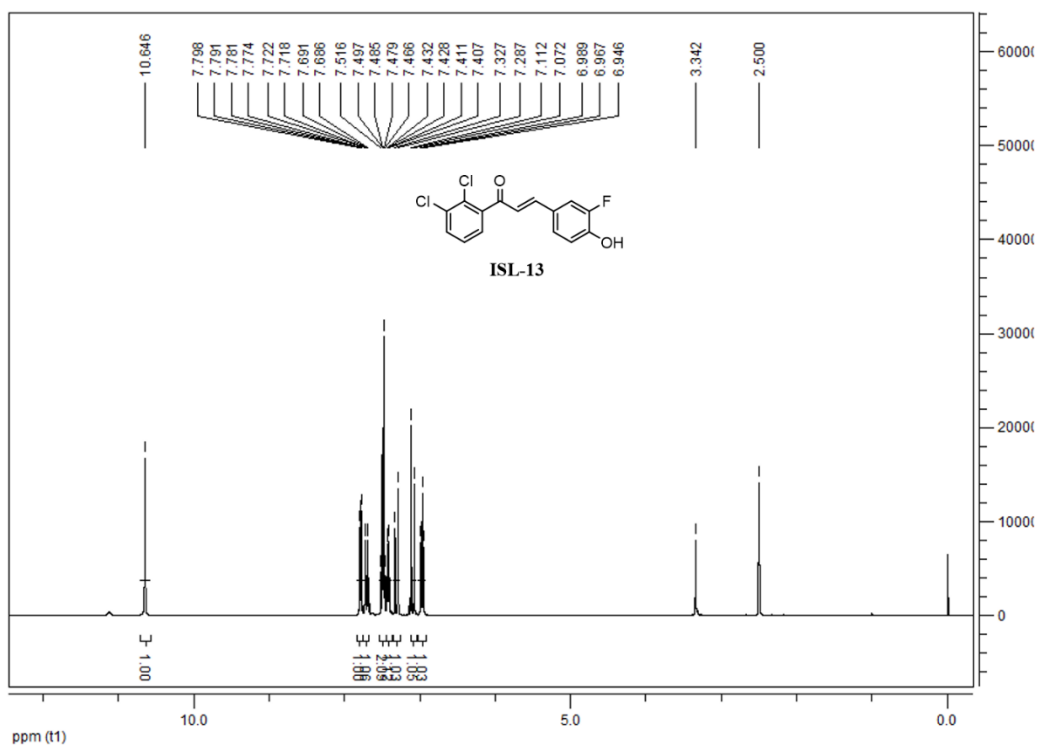

**Figure S25.** The  $^1\text{H}$  NMR spectra of compound ISL-13 (DMSO- $d_6$ , Bruker AVANVEIII 400)

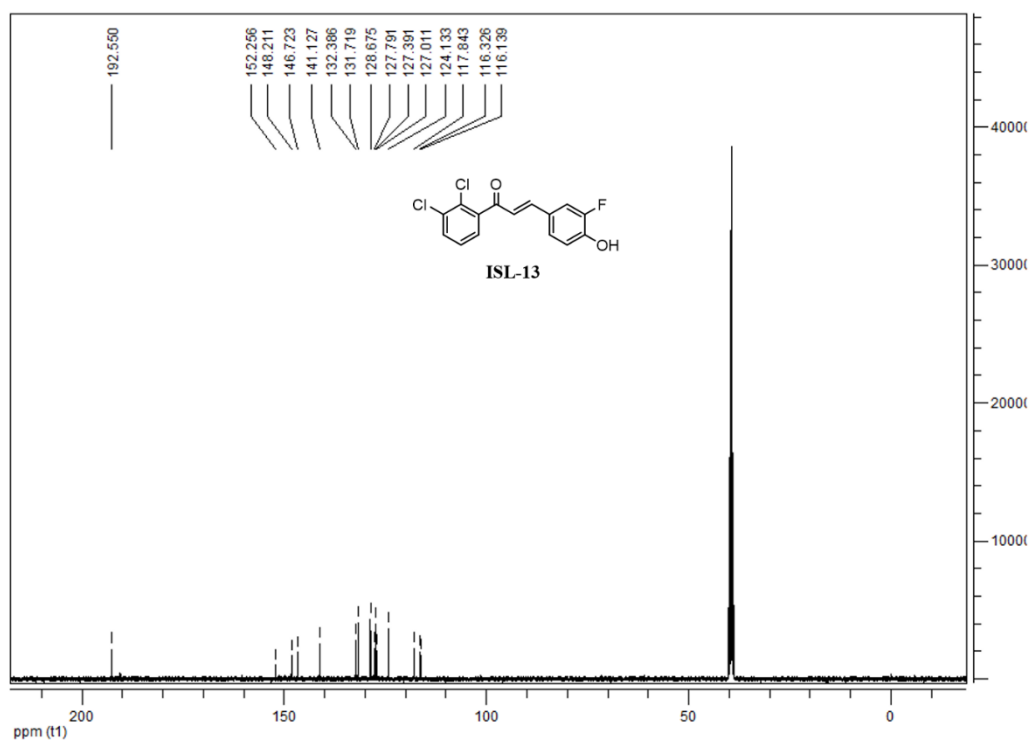

**Figure S26.** The  $^{13}\text{C}$  NMR spectra of compound ISL-13 (DMSO- $d_6$ , Bruker AVANVEIII 400)

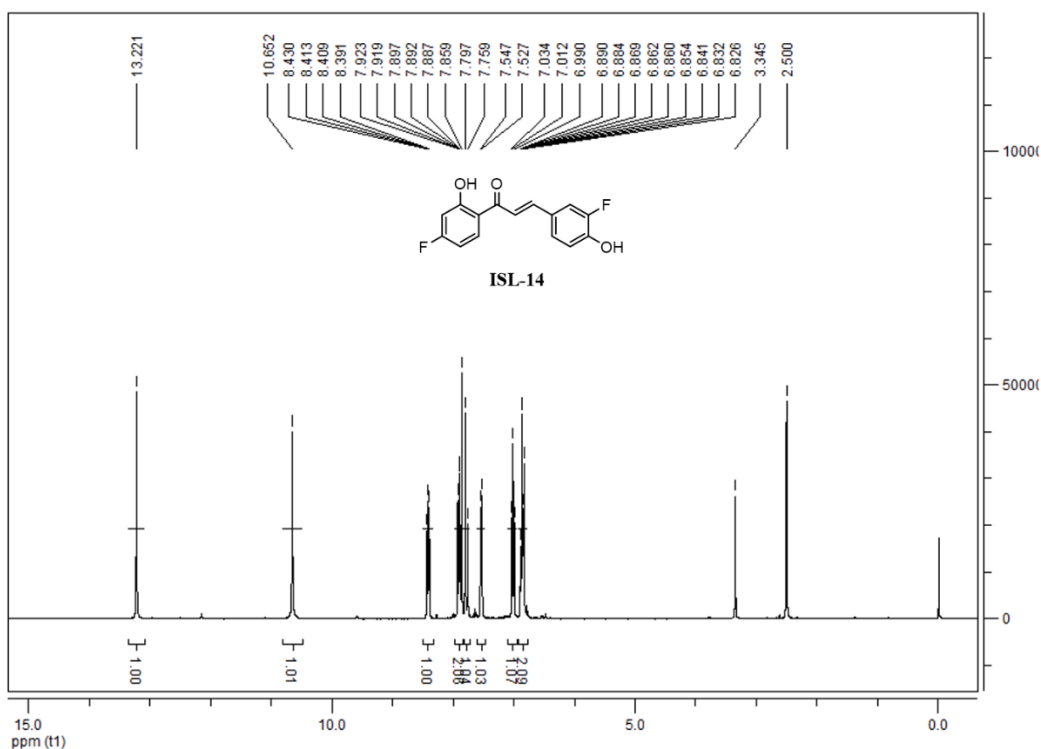

**Figure S27.** The  $^1\text{H}$  NMR spectra of compound **ISL-14** ( $\text{DMSO-}d_6$ , Bruker AVANVEIII 400)

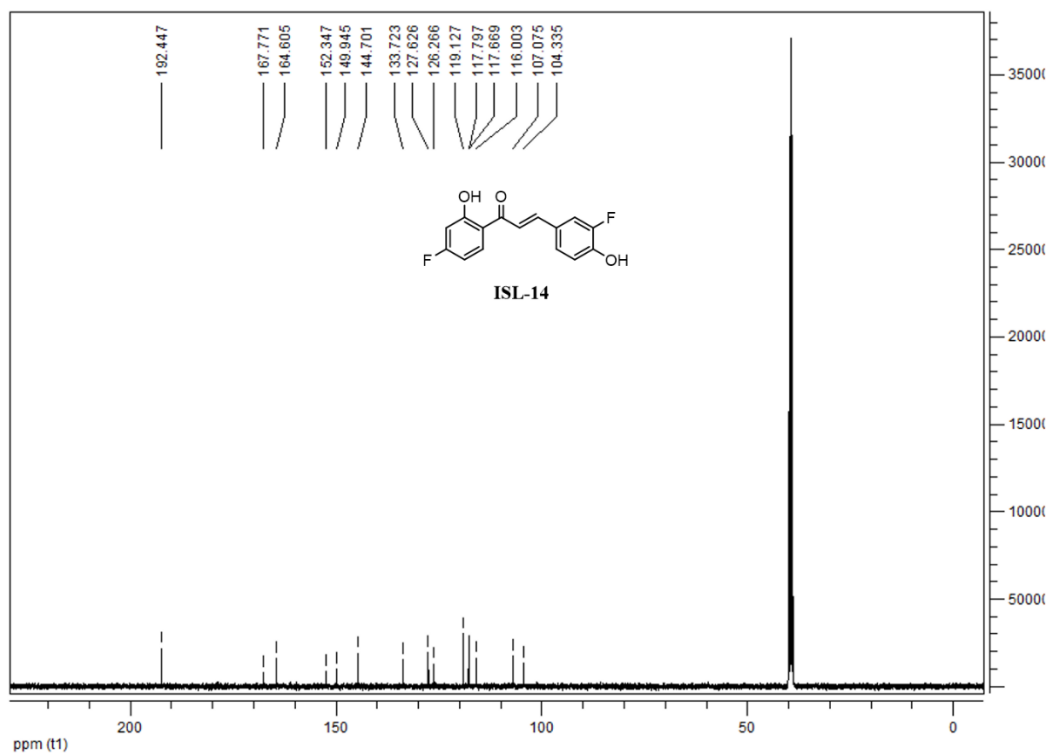

**Figure S28.** The  $^{13}\text{C}$  NMR spectra of compound **ISL-14** ( $\text{DMSO-}d_6$ , Bruker AVANVEIII 400)

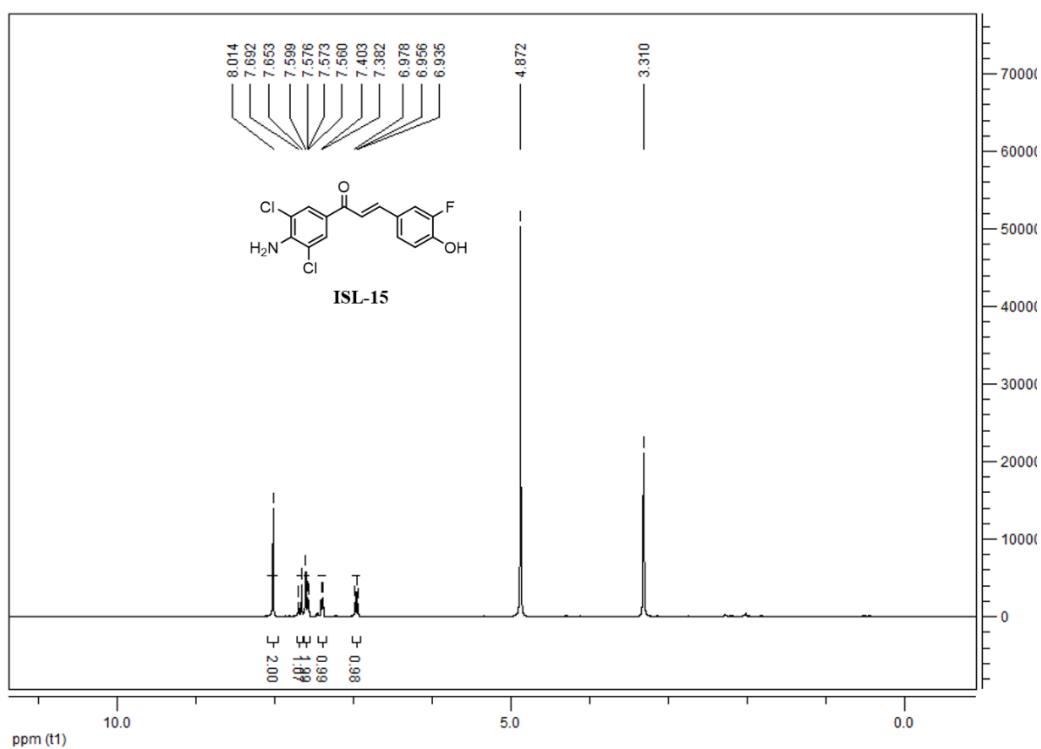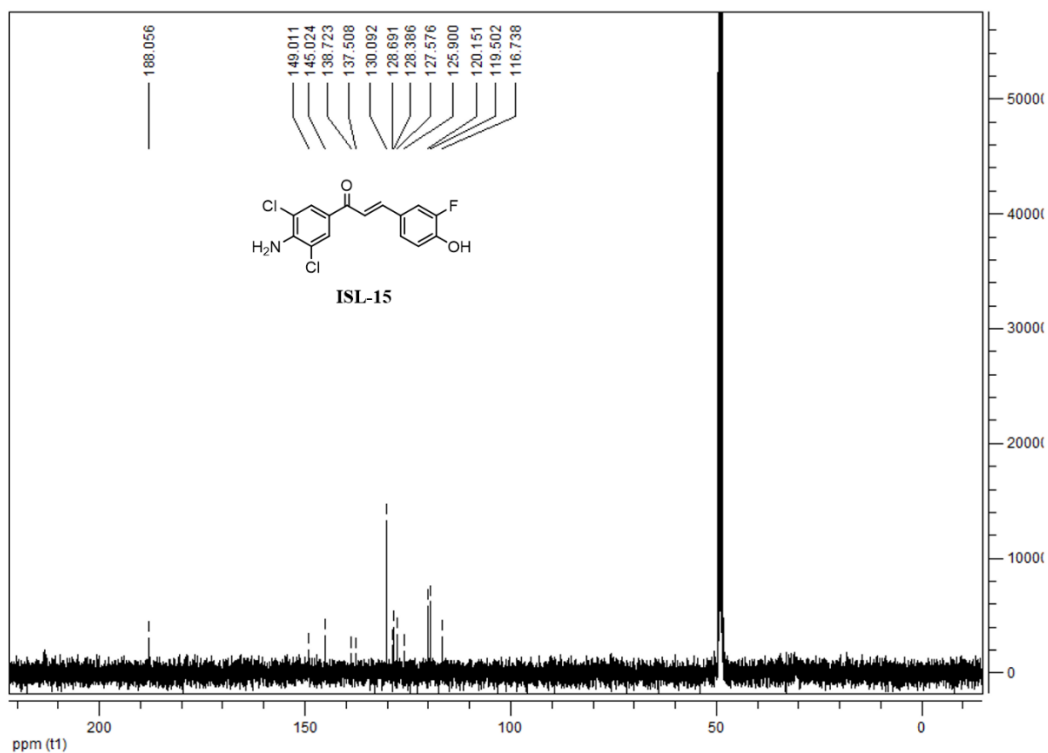



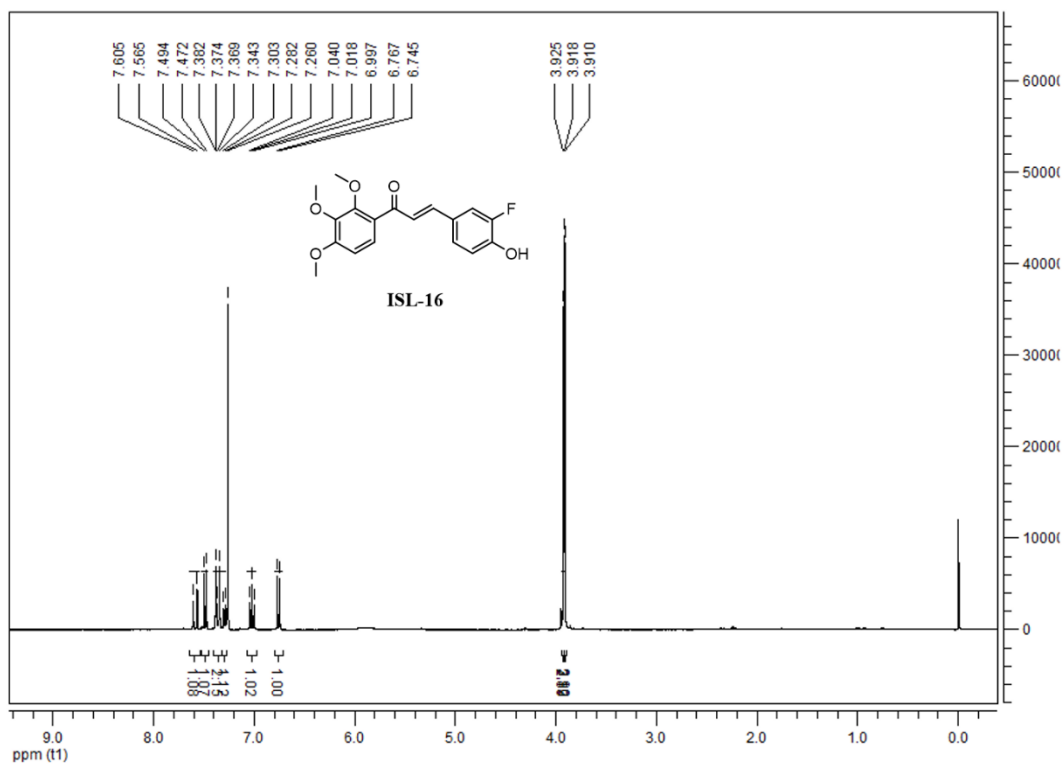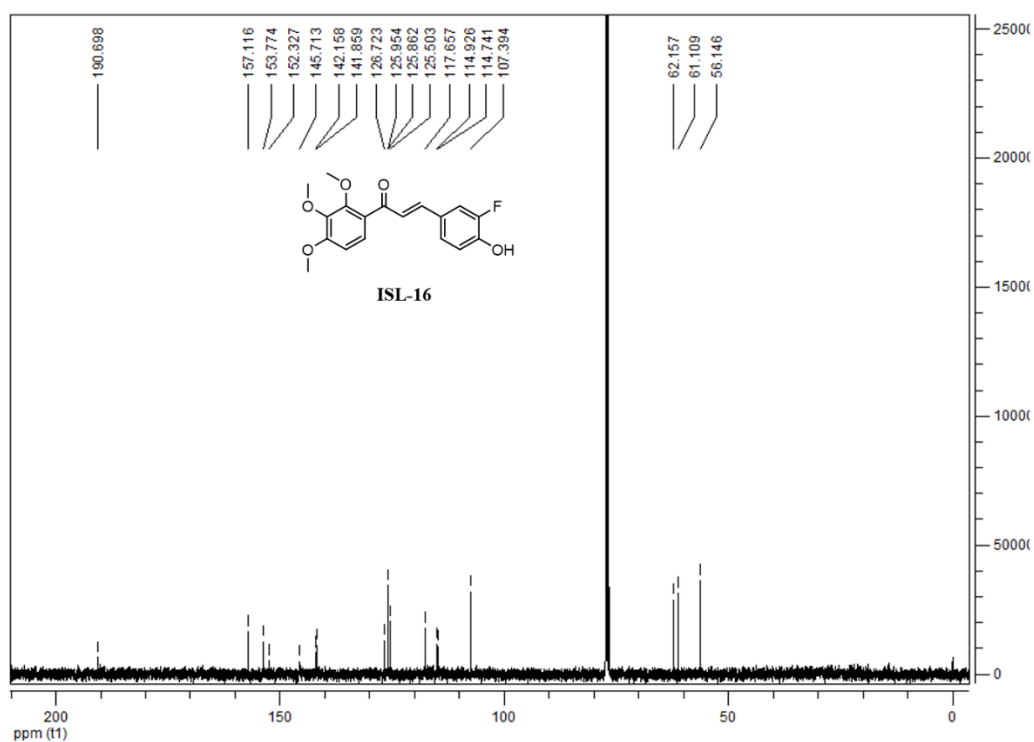

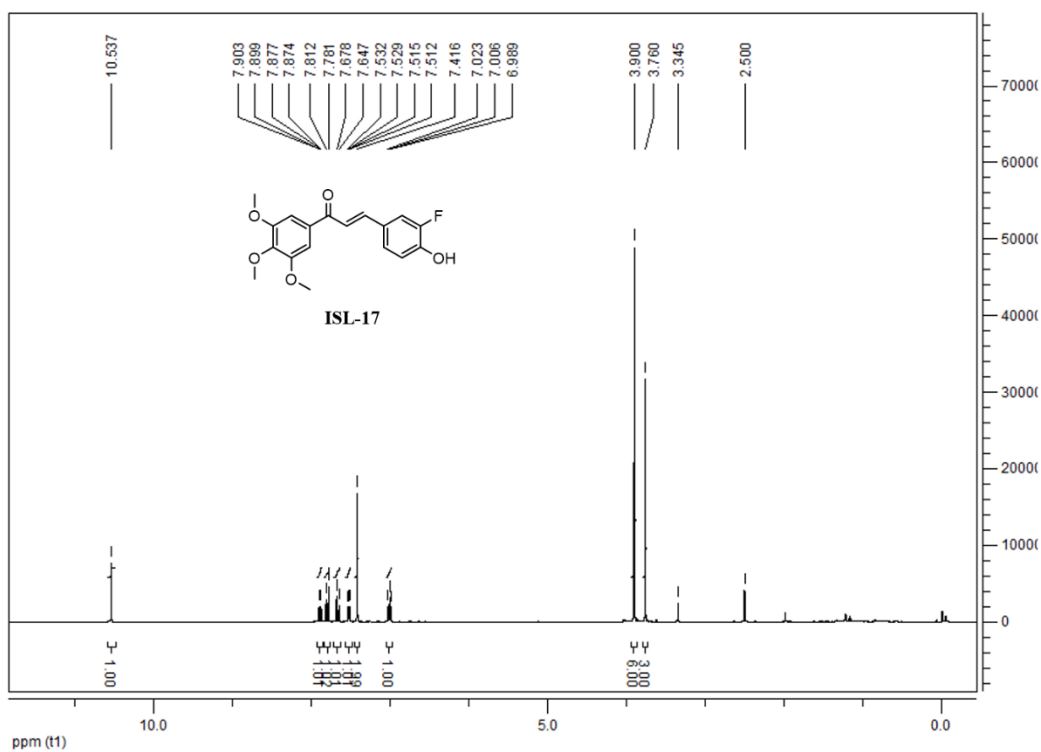

**Figure S33.** The  $^1\text{H}$  NMR spectra of compound **ISL-17** ( $\text{DMSO-}d_6$ , Bruker AVANVEIII 400)

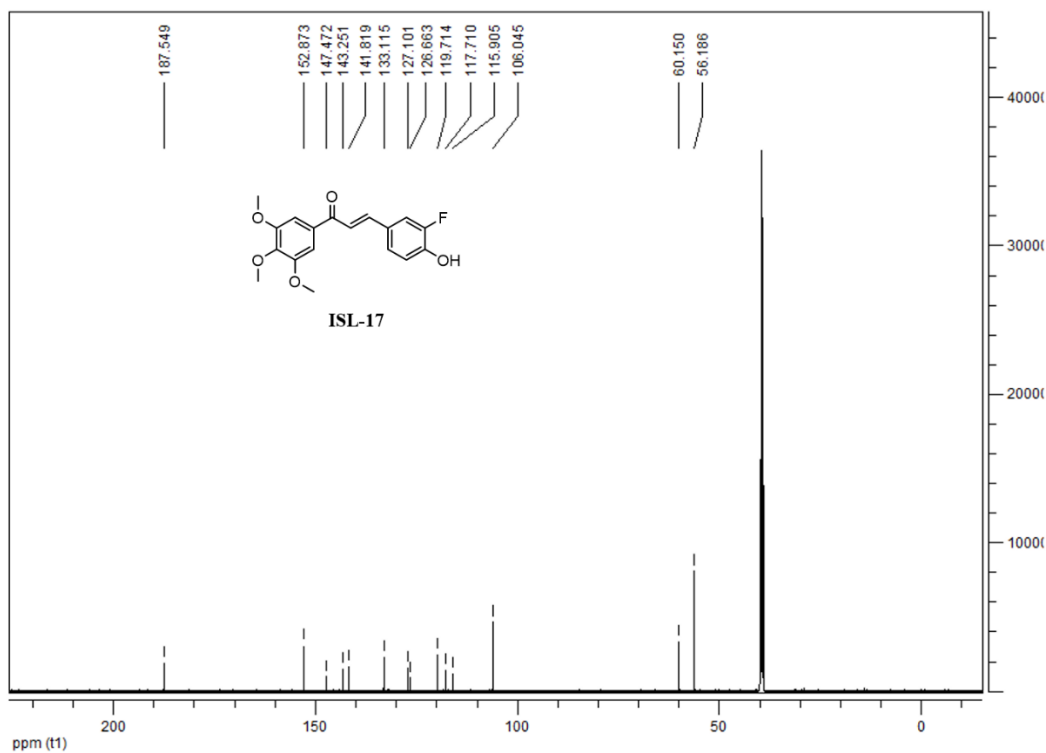

**Figure S34.** The  $^{13}\text{C}$  NMR spectra of compound **ISL-17** ( $\text{DMSO-}d_6$ , Bruker AVANVEIII 400)

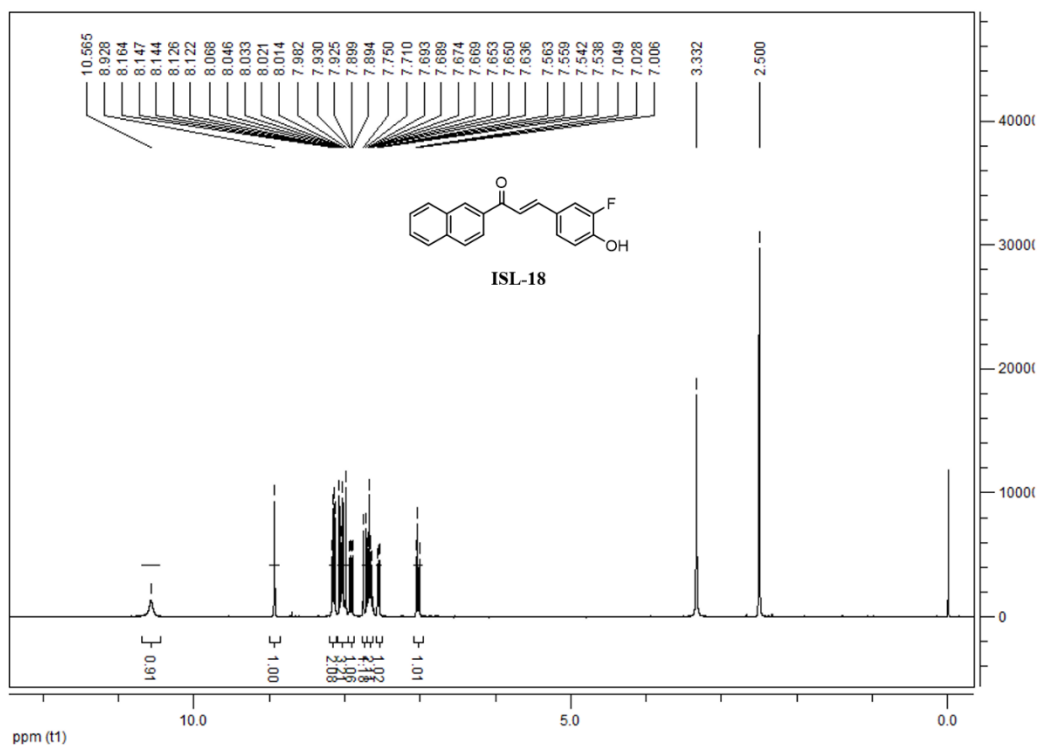

**Figure S35.** The  $^1\text{H}$  NMR spectra of compound **ISL-18** ( $\text{DMSO-}d_6$ , Bruker AVANVEIII 400)

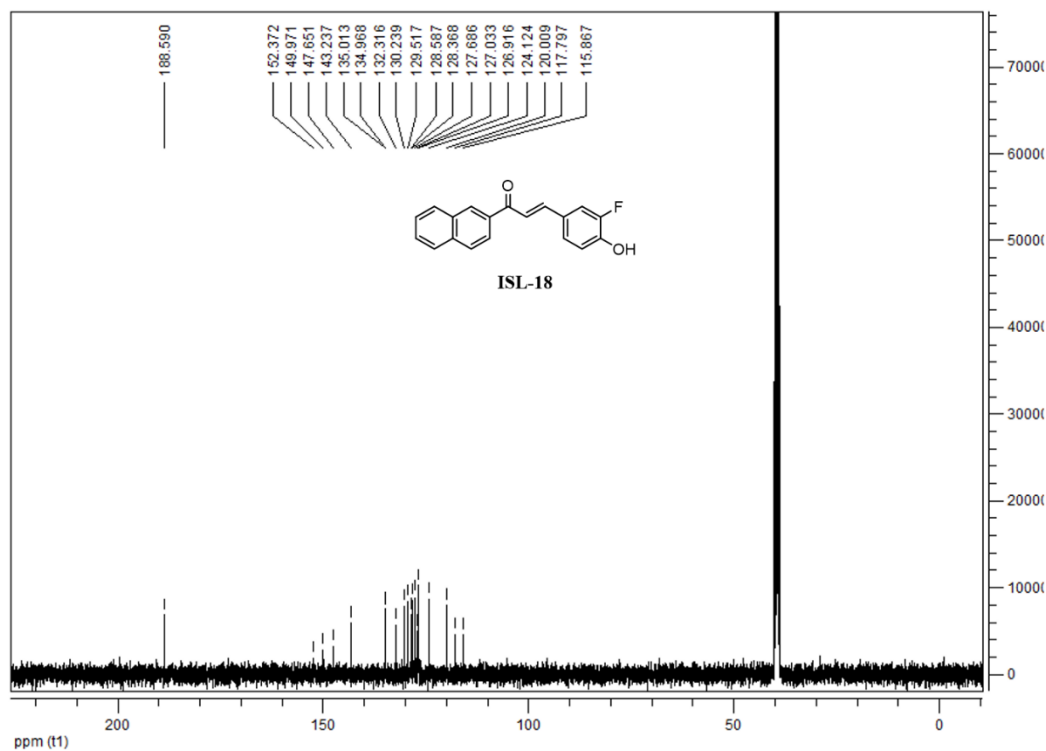

**Figure S36.** The  $^{13}\text{C}$  NMR spectra of compound **ISL-18** ( $\text{DMSO-}d_6$ , Bruker AVANVEIII 400)

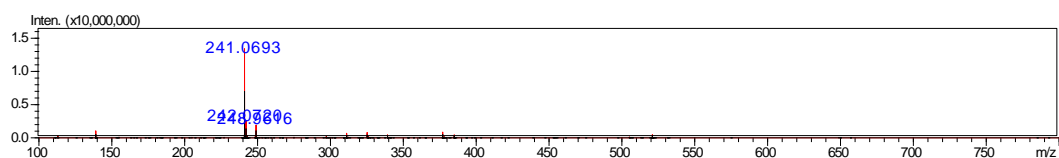

**Figure S37.** The High Resolution Mass Spectrometry (HRMS) spectra of compound **ISL-1** (HRMS (ESI,  $m/z$ ) calcd. for  $C_{15}H_{11}FO_2$  (M-H) $^-$  241.0670, found 241.0693).

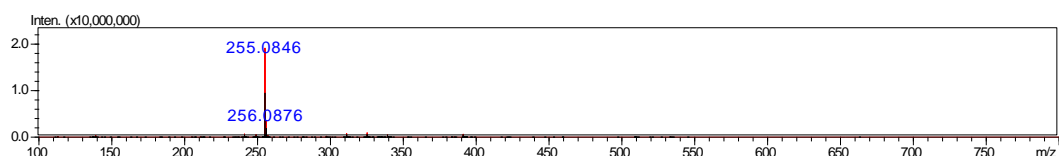

**Figure S38.** The HRMS spectra of compound **ISL-2** (HRMS (ESI,  $m/z$ ) calcd. for  $C_{16}H_{13}FO_2$  (M-H) $^-$  255.0827, found 255.0846).

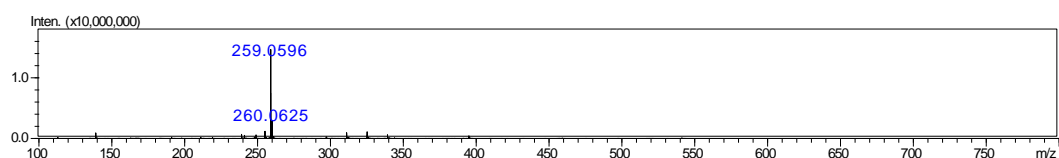

**Figure S39.** The HRMS spectra of compound **ISL-3** (HRMS (ESI,  $m/z$ ) calcd. for  $C_{15}H_{10}F_2O_2$  (M-H) $^-$  259.0576, found 259.0596).

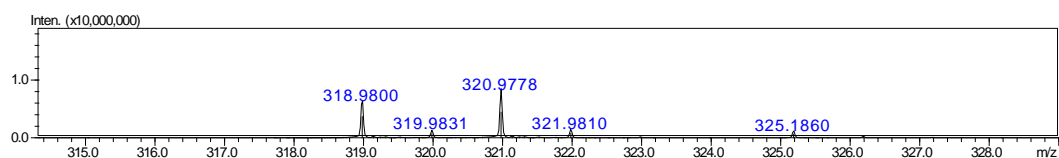

**Figure S40.** The HRMS spectra of compound **ISL-4** (HRMS (ESI,  $m/z$ ) calcd. for  $C_{15}H_{10}BrFO_2$  (M-H) $^-$  318.9775, found 318.9800).

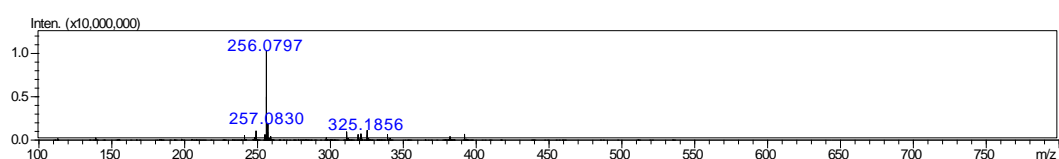

**Figure S41.** The HRMS spectra of compound **ISL-5** (HRMS (ESI,  $m/z$ ) calcd. for  $C_{15}H_{12}FNO_2$  (M-H) $^-$  256.0779, found 256.0797).

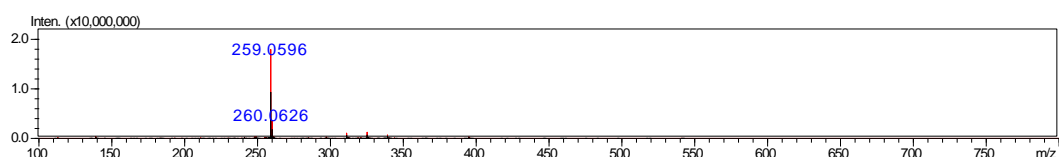

**Figure S42.** The HRMS spectra of compound **ISL-6** (HRMS (ESI,  $m/z$ ) calcd. for  $C_{15}H_{10}F_2O_2$  (M-H) $^-$  259.0576, found 259.0596).

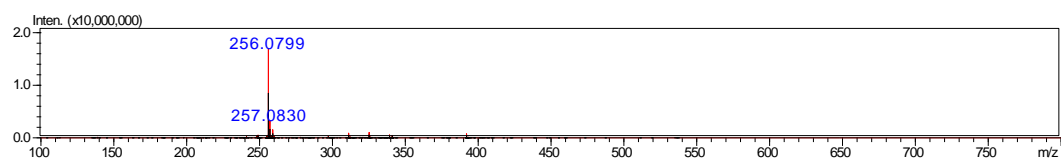

**Figure S43.** The HRMS spectra of compound **ISL-7** (HRMS (ESI,  $m/z$ ) calcd. for  $C_{15}H_{12}FNO_2$  (M-H)<sup>-</sup> 256.0779, found 256.0799).

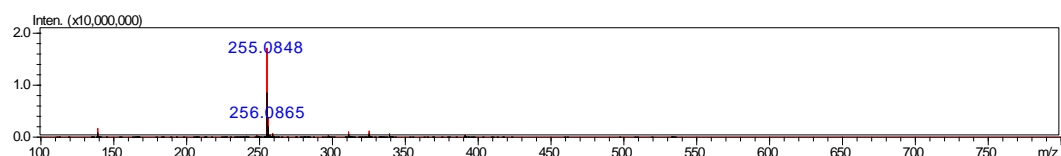

**Figure S44.** The HRMS spectra of compound **ISL-8** (HRMS (ESI,  $m/z$ ) calcd. for  $C_{16}H_{13}FO_2$  (M-H)<sup>-</sup> 255.0827, found 255.0848).

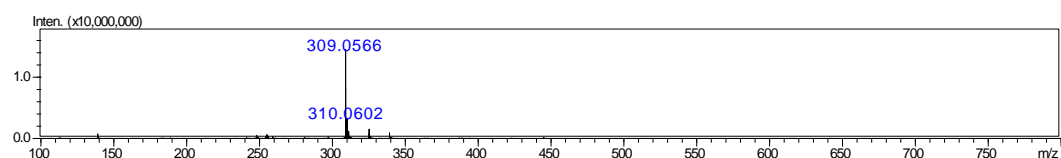

**Figure S45.** The HRMS spectra of compound **ISL-9** (HRMS (ESI,  $m/z$ ) calcd. for  $C_{16}H_{10}F_4O_2$  (M-H)<sup>-</sup> 309.0544, found 309.0566).

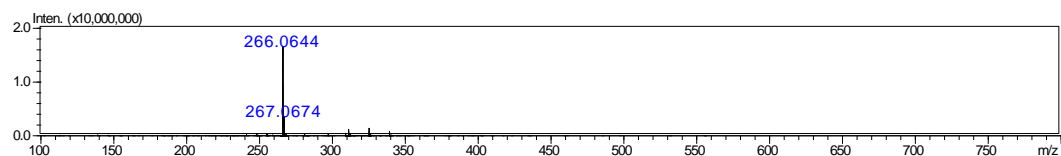

**Figure S46.** The HRMS spectra of compound **ISL-10** (HRMS (ESI,  $m/z$ ) calcd. for  $C_{16}H_{10}FNO_2$  (M-H)<sup>-</sup> 266.0623, found 266.0644).

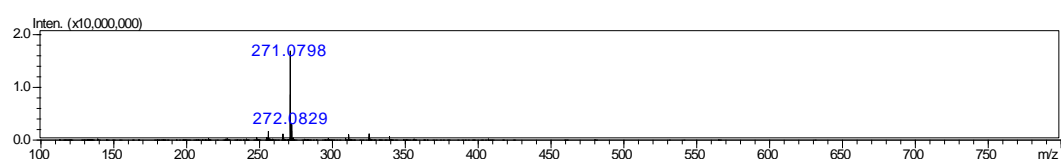

**Figure S47.** The HRMS spectra of compound **ISL-11** (HRMS (ESI,  $m/z$ ) calcd. for  $C_{16}H_{13}FO_3$  (M-H)<sup>-</sup> 271.0776, found 271.0798).

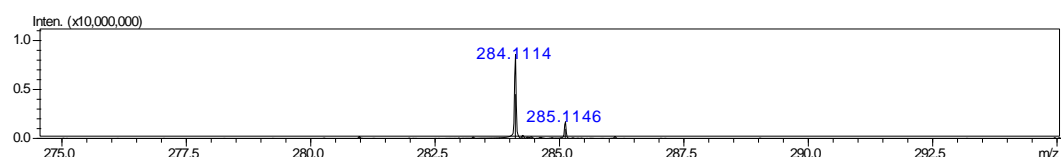

**Figure S48.** The HRMS spectra of compound **ISL-12** (HRMS (ESI,  $m/z$ ) calcd. for  $C_{17}H_{16}FNO_2$  (M-H)<sup>-</sup> 284.1092, found 284.1114).

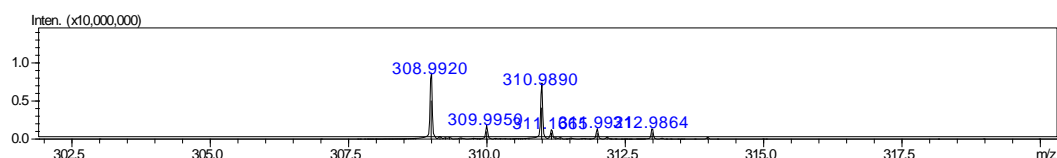

**Figure S49.** The HRMS spectra of compound **ISL-13** (HRMS (ESI,  $m/z$ ) calcd. for  $C_{15}H_9Cl_2FO_2$  (M-H)<sup>-</sup> 308.9891, found 308.9920).

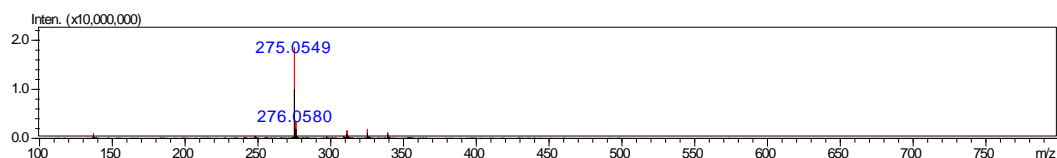

**Figure S50.** The HRMS spectra of compound **ISL-14** (HRMS (ESI,  $m/z$ ) calcd. for  $C_{15}H_{10}F_2O_3$  (M-H)<sup>-</sup> 275.0525, found 275.0549).

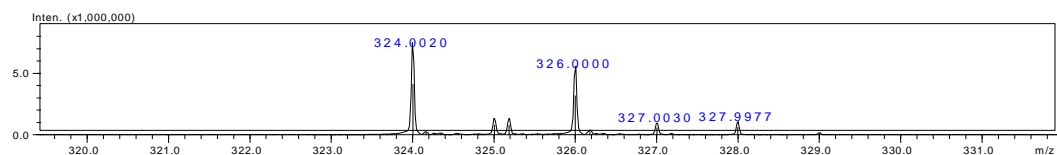

**Figure S51.** The HRMS spectra of compound **ISL-15** (HRMS (ESI,  $m/z$ ) calcd. for  $C_{15}H_{10}Cl_2FNO_2$  (M-H)<sup>-</sup> 324.0000, found 324.0020).

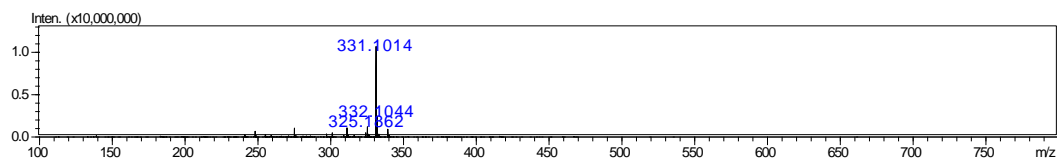

**Figure S52.** The HRMS spectra of compound **ISL-16** (HRMS (ESI,  $m/z$ ) calcd. for  $C_{18}H_{17}FO_5$  (M-H)<sup>-</sup> 331.0987, found 331.1014).

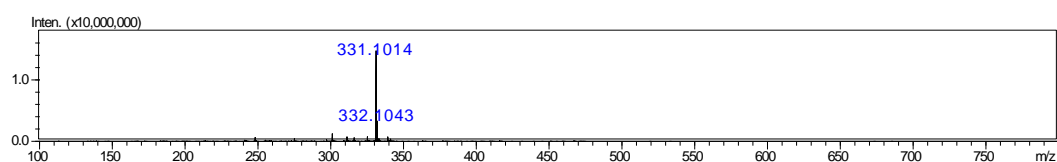

**Figure S53.** The HRMS spectra of compound **ISL-17** (HRMS (ESI,  $m/z$ ) calcd. for  $C_{18}H_{17}FO_5$  (M-H)<sup>-</sup> 331.0987, found 331.1014).

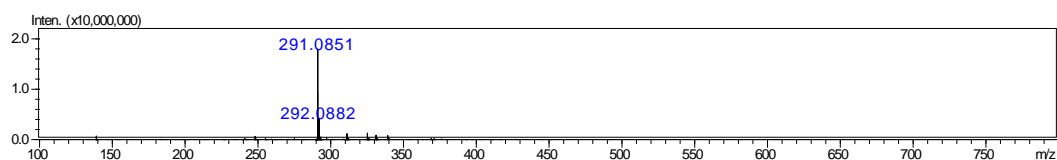

**Figure S54.** The HRMS spectra of compound **ISL-18** (HRMS (ESI,  $m/z$ ) calcd. for  $C_{19}H_{13}FO_2$  (M-H)<sup>-</sup> 291.0827, found 291.0851).
